# Supplementary material for: Nicotinamide Riboside Augments the Aged Human Skeletal Muscle NAD+ Metabolome and Induces Transcriptomic and Anti-inflammatory Signatures
Source: PubMed Central journal article supplement (PMC6702140; doi:10.1016/j.celrep.2019.07.043), 2019-08-13
Supplement: mmc1.pdf [file mmc1.pdf]

**Supplemental Information**

**Nicotinamide Riboside Augments the Aged Human**

**Skeletal Muscle NAD<sup>+</sup> Metabolome and Induces**

**Transcriptomic and Anti-inflammatory Signatures**

**Yasir S. Elhassan, Katarina Kluckova, Rachel S. Fletcher, Mark S. Schmidt, Antje Garten, Craig L. Doig, David M. Cartwright, Lucy Oakey, Claire V. Burley, Ned Jenkinson, Martin Wilson, Samuel J.E. Lucas, Ildem Akerman, Alex Seabright, Yu-Chiang Lai, Daniel A. Tennant, Peter Nightingale, Gareth A. Wallis, Konstantinos N. Manolopoulos, Charles Brenner, Andrew Philp, and Gareth G. Lavery**

## SUPPLEMENTAL INFORMATION

**Suppl. Table 1. Related to Figures 1 and 5.** Cardiometabolic parameters at baseline and after nicotinamide riboside (NR) and placebo. Data are presented as median (1<sup>st</sup> quartile, 3<sup>rd</sup> quartile).

| <b>Parameter</b>                       | <b>Baseline</b>   | <b>NR</b>         | <b>Placebo</b>    |
|----------------------------------------|-------------------|-------------------|-------------------|
| <b>Age (years)</b>                     | 75 (72, 78)       | -                 | -                 |
| <b>Weight (kg)</b>                     | 82.6 (76.5, 90.1) | 83 (76.3, 89.9)   | 82.6 (77.0, 89.6) |
| <b>BMI (kg/m<sup>2</sup>)</b>          | 26.6 (25.0, 30.0) | 26.9 (24.9, 29.5) | 26.9 (25.1, 29.3) |
| <b>Systolic blood pressure (mmHg)</b>  | 139 (136, 154)    | 138 (130, 147)    | 134 (126, 155)    |
| <b>Diastolic blood pressure (mmHg)</b> | 86 (83, 93)       | 84 (79, 93)       | 81 (77, 90)       |
| <b>Fasting glucose (mmol/L)</b>        | 5.88 (5.63, 6.31) | 6.04 (5.81, 6.23) | 5.85 (5.67, 6.30) |
| <b>Fasting insulin (mU/L)</b>          | 7.07 (7.27, 8.67) | 6.27 (5.47, 7.07) | 7.06 (5.47, 8.67) |
| <b>Cholesterol (mmol/L)</b>            | 4.8 (3.6, 5.2)    | 4.6 (3.9, 5.6)    | 4.6 (4.2, 5.3)    |
| <b>HDL cholesterol (mmol/L)</b>        | 1.4 (1.2, 1.5)    | 1.3 (1.2, 1.5)    | 1.4 (1.1, 1.5)    |
| <b>Triglycerides (mmol/L)</b>          | 1.0 (0.6, 1.2)    | 1.0 (0.8, 1.2)    | 1.0 (0.7, 1.2)    |

**Suppl. Table 2. Related to Figure 1.** Safety parameters at baseline and after nicotinamide riboside (NR) and placebo. Data presented as median (1<sup>st</sup> quartile, 3<sup>rd</sup> quartile). ALT, alanine aminotransferase; TSH, thyroid stimulating hormone; Free T4, free thyroxine.

| <b>Parameter</b>                            | <b>Baseline</b>   | <b>NR</b>         | <b>Placebo</b>    |
|---------------------------------------------|-------------------|-------------------|-------------------|
| <b>Haemoglobin (g/L)</b>                    | 139 (129, 145)    | 133 (128, 139)    | 136 (131, 149)    |
| <b>White cell count (x10<sup>9</sup>/L)</b> | 6.2 (5.5, 7.0)    | 6.2 (5.3, 6.9)    | 6.2 (5.7, 7.1)    |
| <b>Platelets (x10<sup>9</sup>/L)</b>        | 187 (174, 233)    | 184 (169, 221)    | 203 (171, 231)    |
| <b>Sodium (mmol/l)</b>                      | 140 (139, 143)    | 139.5 (137, 142)  | 141 (137, 142)    |
| <b>Potassium (mmol/l)</b>                   | 4.2 (4.0, 4.3)    | 4.3 (4.1, 4.4)    | 4.2 (4.1, 4.5)    |
| <b>Urea (mmol/L)</b>                        | 6.0 (4.2, 6.5)    | 4.6 (4.0, 5.8)    | 5.1 (4.4, 6.0)    |
| <b>Creatinine (µmol/L)</b>                  | 74 (64, 78)       | 71 (67, 85)       | 74 (67, 79)       |
| <b>Calcium (mmol/L)</b>                     | 2.3 (2.2, 2.4)    | 2.3 (2.2, 2.4)    | 2.3 (2.2, 2.3)    |
| <b>Albumin (g/L)</b>                        | 43 (42, 44)       | 42 (40, 42)       | 42 (39, 43)       |
| <b>Total protein (g/L)</b>                  | 65 (63, 70)       | 65 (63, 67)       | 65 (62, 67)       |
| <b>Alkaline phosphatase (u/L)</b>           | 56 (45, 62)       | 55 (46, 61)       | 52 (48, 62)       |
| <b>Bilirubin (umol/L)</b>                   | 7 (6, 10)         | 8 (6, 10)         | 8 (6, 9)          |
| <b>ALT (u/L)</b>                            | 17 (14, 17)       | 14 (12, 15)       | 16 (13, 19)       |
| <b>TSH (mIU/L)</b>                          | 1.7 (1.0, 2.7)    | 1.8 (1.3, 2.8)    | 1.6 (1.1, 2.5)    |
| <b>Free T4 (pmol/L)</b>                     | 14.0 (12.1, 15.1) | 13.7 (13.4, 17.4) | 14.8 (13.1, 17.5) |

| Outcome           | Measure                                    | Day                             |                                                                    |                                                     |                     |         |                                  |                                                     |                     |
|-------------------|--------------------------------------------|---------------------------------|--------------------------------------------------------------------|-----------------------------------------------------|---------------------|---------|----------------------------------|-----------------------------------------------------|---------------------|
|                   |                                            | Day 0<br>(Visit 1)<br>Enrolment | Day 1<br>(Visit 2)<br>Baseline<br>assessments and<br>randomization |                                                     | Day 22<br>(Visit 3) |         | Day 43<br>(Visit 4)<br>Crossover |                                                     | Day 64<br>(visit 5) |
| Safety            | Medical history and examination*           | •                               | •                                                                  |                                                     | •                   |         | •                                |                                                     | •                   |
|                   | Adverse events and compliance              |                                 | •                                                                  |                                                     | •                   |         | •                                |                                                     | •                   |
|                   | Blood tests**                              |                                 | •                                                                  |                                                     | •                   |         | •                                |                                                     | •                   |
| Study assessments | Blood pressure                             | •                               | •                                                                  |                                                     | •                   |         | •                                |                                                     | •                   |
|                   | Fasting blood                              |                                 | •                                                                  | Nicotinamide riboside 500 mg twice daily or placebo | •                   | Washout | •                                | Nicotinamide riboside 500 mg twice daily or placebo | •                   |
|                   | Hand-grip strength                         |                                 | •                                                                  |                                                     | •                   |         |                                  |                                                     | •                   |
|                   | Muscle biopsy                              |                                 | •                                                                  |                                                     | •                   |         |                                  |                                                     | •                   |
|                   | Glucose tolerance test                     |                                 | •                                                                  |                                                     | •                   |         |                                  |                                                     | •                   |
|                   | Indirect calorimetry                       |                                 | •                                                                  |                                                     | •                   |         |                                  |                                                     | •                   |
|                   | Muscle arterio-venous difference technique |                                 | •                                                                  |                                                     | •                   |         |                                  |                                                     | •                   |
|                   | Venous occlusive plethysmography           |                                 | •                                                                  |                                                     | •                   |         |                                  |                                                     | •                   |
|                   | 24 hour urine                              |                                 | •                                                                  |                                                     | •                   |         | •                                |                                                     | •                   |

**Suppl. Figure 1. Schedule of study visits. Related to STAR methods.**

Outline of the measures undertaken in each of the 5 study visits and the time interval between visits. \*Body weight and height, systemic examination, and resting electrocardiogram. \*\* Full blood count, and renal, liver, and thyroid functions.

A.

## Muscle

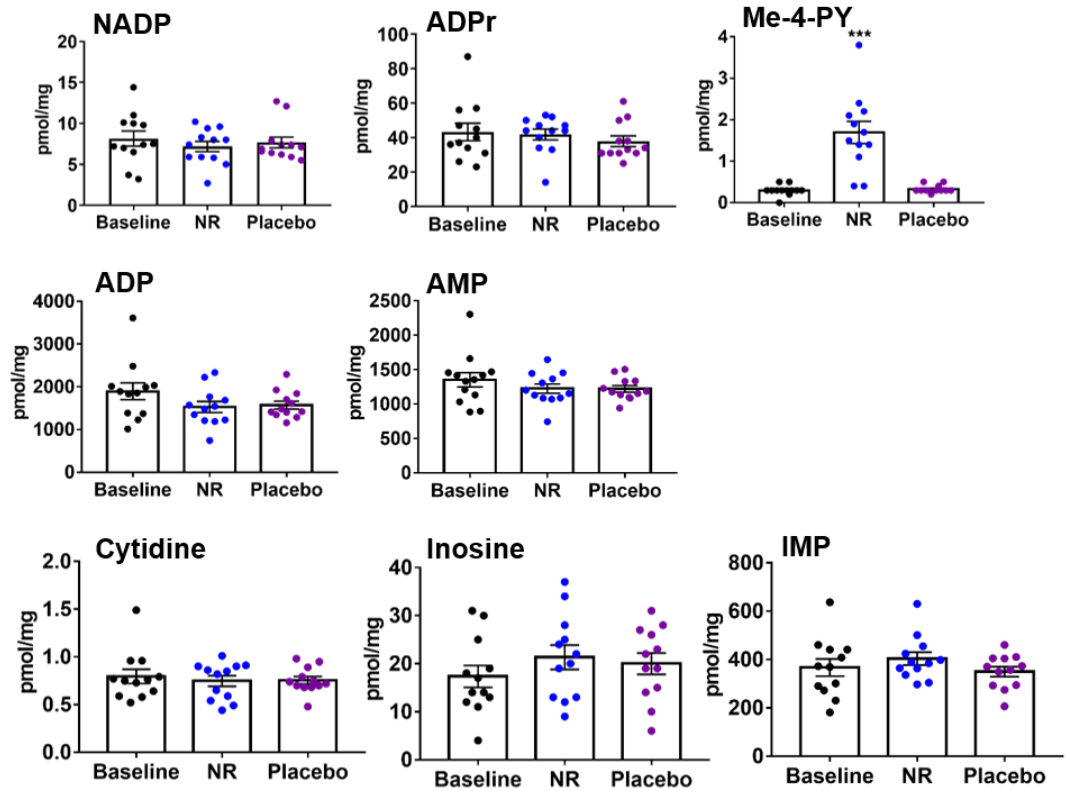

B.

## Blood

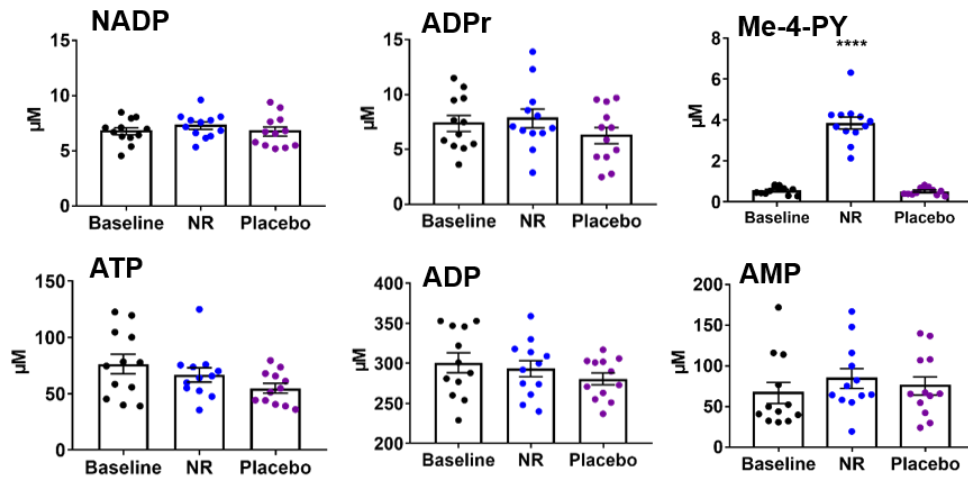

C.

## Urine

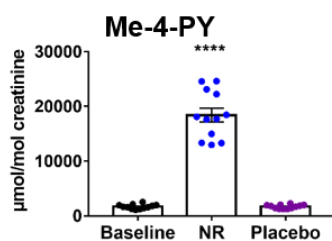

**Suppl. Figure 2. NAD<sup>+</sup> metabolomics in skeletal muscle, whole blood and urine. Related to Figure 1.**

Remainder of LC-MS/MS NAD<sup>+</sup> metabolomics in (A) skeletal muscle, (B) whole blood, and (C) urine, which were not shown in Figure 1. NADP, nicotinamide adenine dinucleotide phosphate; ADPr, adenosine diphosphate ribose, Me-4-py, N1-Methyl-4-pyridone-5-carboxamide; ATP, adenosine triphosphate; ADP, adenosine diphosphate; AMP, adenosine monophosphate. Data are obtained from 12 participants at each phase and presented as mean  $\pm$  SEM. Significance was set at  $p < 0.05$  using paired t-test. The absence of significance symbols indicates lack of statistical significance.

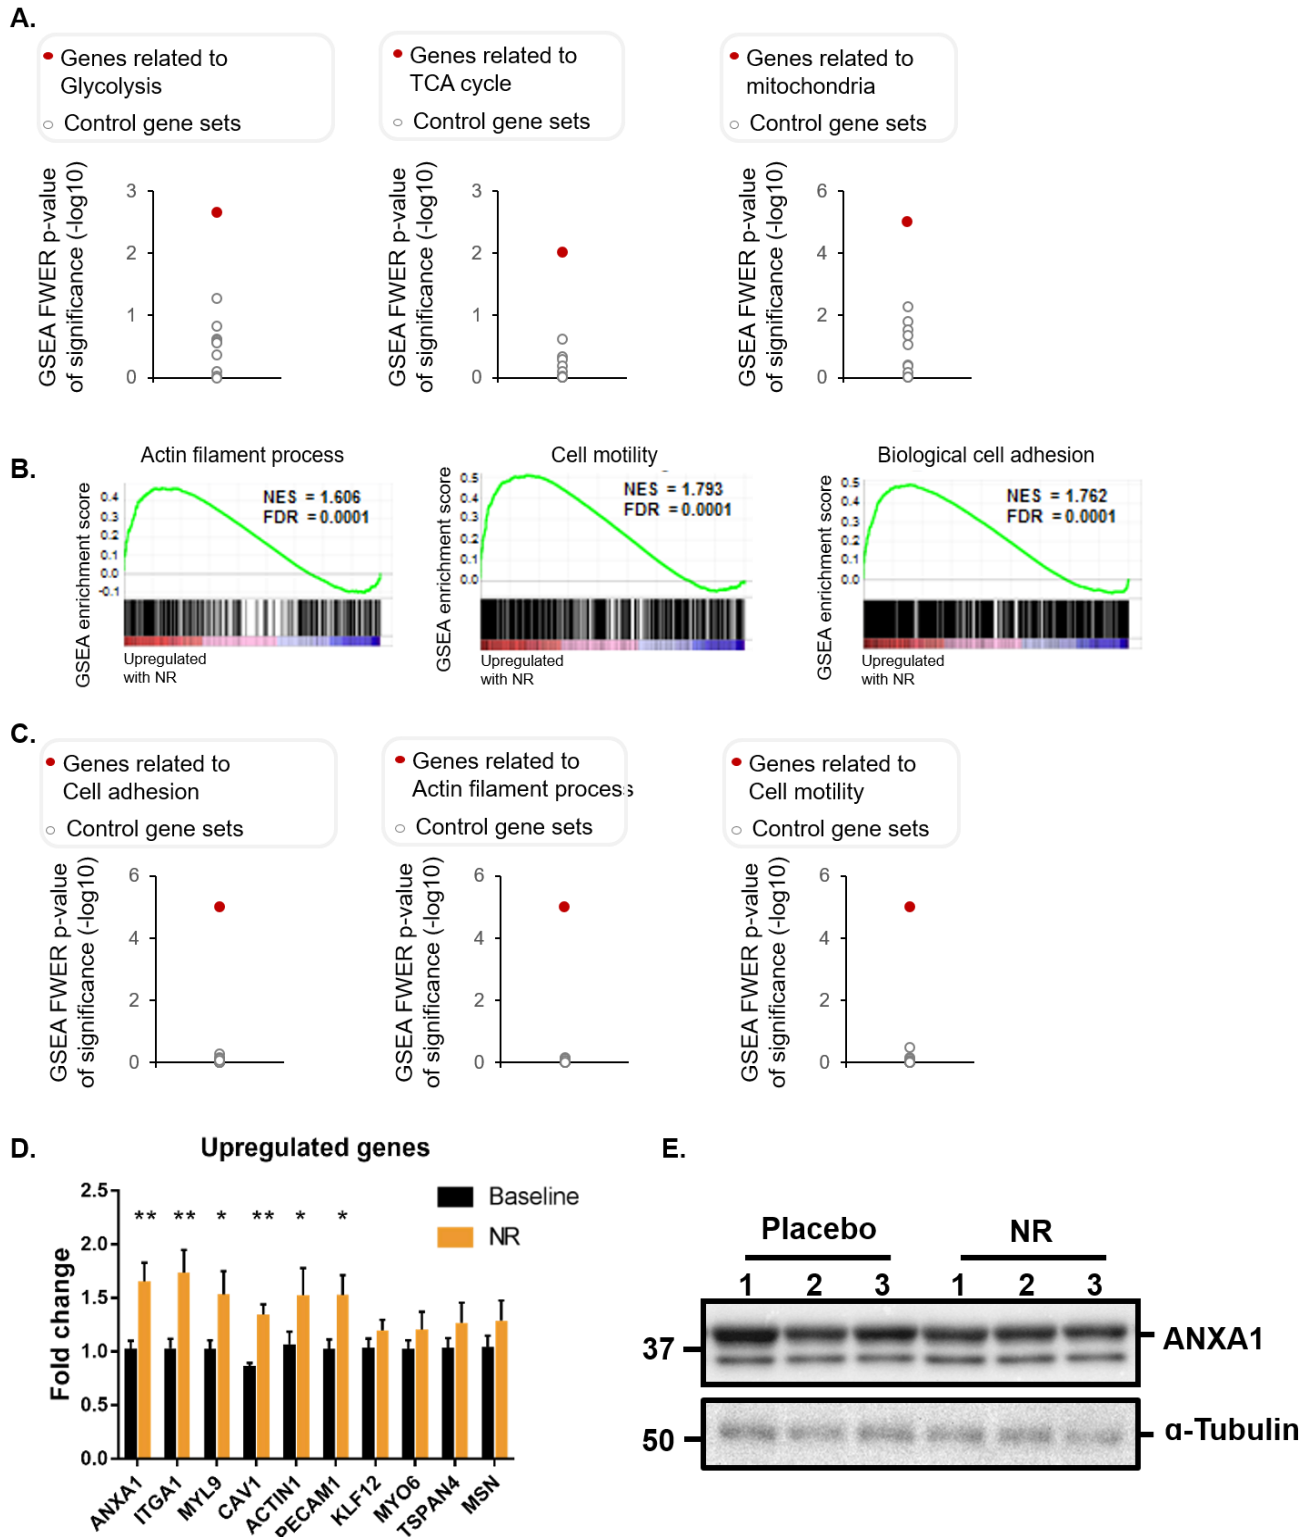

**Suppl. Figure 3. Skeletal muscle RNA sequencing. Related to Figure 2.**

(A) Bar plots show GSEA p-value of significance ( $-\log_{10}$ ) for enrichment of genes belonging to the pathways glycolysis, TCA cycle and mitochondria for downregulated targets of NR supplementation (in red). The same analysis on 10 gene sets of equal size and expression level do not reveal enrichment amongst downregulated targets of NR (in grey). (B) Gene set enrichment analysis (GSEA) suggests that genes belonging to the gene sets

“Actin filament process”, “Cell motility”, and “Biological cell adhesion” are upregulated upon NR supplementation. Normalized enrichment score (NES) and nominal p-value is presented on the top left corner of the graph.

(C) Bar plots show GSEA p-value of significance (-Log10) for enrichment of genes belonging to the pathways “Actin filament process”, “Cell motility”, and “Biological cell adhesion” for upregulated targets of NR supplementation (in red). The same analysis on 10 gene sets of equal size and expression level do not reveal enrichment amongst upregulated targets of NR (ingrey).

(D) Quantitative PCR analysis of a select panel of upregulated genes identified through differential gene expression analysis. GAPDH was used as housekeeping gene. Error bars represent SEM (n=12).

(E) Quantification of Annexin A1 (ANXA1) protein using immunoblotting assay. Tubulin was used as a loading control.



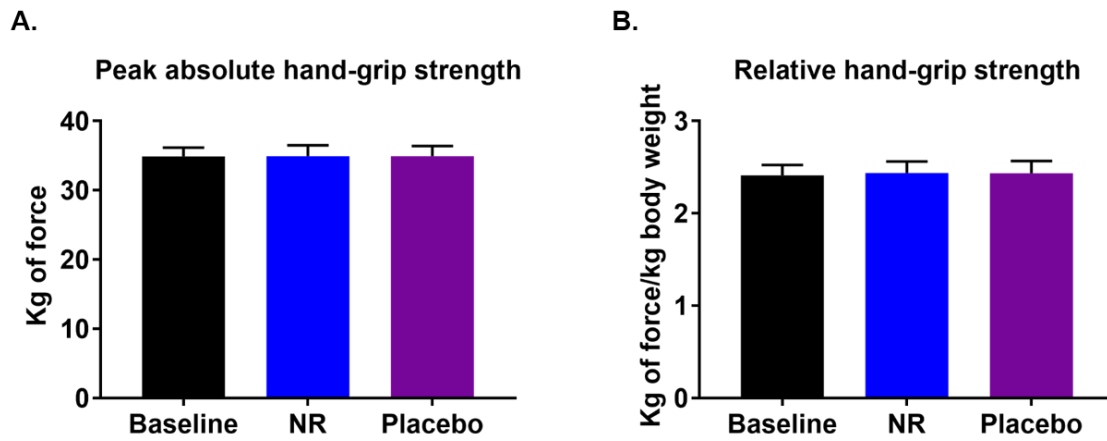

**Suppl. Figure 4. Hand-grip strength. Related to Figure3.**

(A) Peak hand-grip strength at baseline and after each of the nicotinamide riboside (NR) and placebo phases. (B) Similar to (A) but data presented relative to body weight. Data are obtained from 12 participants at each phase and presented as mean  $\pm$  SEM. Significance was set at  $p < 0.05$  using paired t-test. The absence of significance symbols indicates lack of statistical significance.

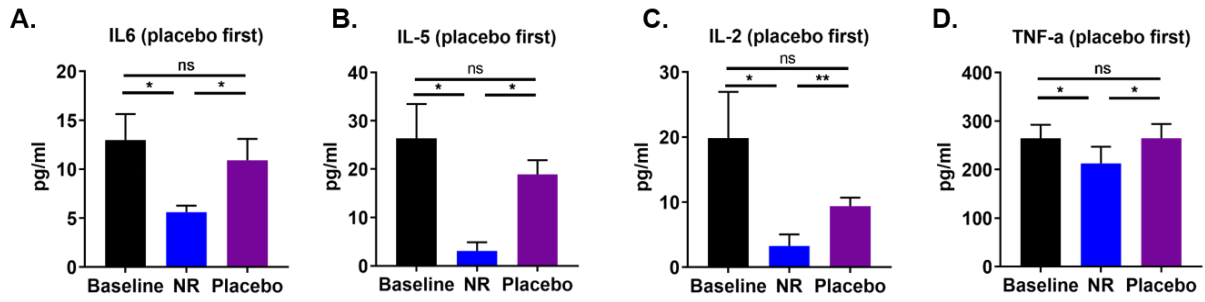

**Suppl. Figure 5. Inflammatory cytokines period effect. Related to Figure 6.**

Levels of serum inflammatory cytokines at baseline and after each of the nicotinamide riboside (NR) and placebo phases, including: (A) interleukin 6 (IL-6), (B) interleukin 5 (IL-5), (C) interleukin 2 (IL-2), and (D) tumor necrosis factor-alpha (TNF-a). Here period effect analysis is shown and each panel is produced from only the 6 subjects that were randomized to placebo first as a demonstration of the NR carryover effect, evident in the cases IL-2 (C) and TNF-a (D). Data are presented as mean  $\pm$  SEM. Significance was set at  $p < 0.05$  using paired t-test.
